# Supplementary material
Source: publisher figshare collection journal article supplement (https://acs.figshare.com/ndownloader/files/3826258)
Supplement: Supplementary file 1 [file 3826258]

## **Supporting Information**

### **A promising approach for improving adhesion capacity of foliar nitrogen fertilizer**

Min Wang,<sup>||,†,‡,§</sup> Xiao Sun,<sup>||,†,§</sup> Naiqin Zhong,<sup>¶</sup> Dongqing Cai,<sup>\*,†,§</sup> and Zhengyan Wu<sup>\*,†,§</sup>

<sup>†</sup>Key Laboratory of Ion Beam Bioengineering, Hefei Institutes of Physical Science, Chinese Academy of Sciences and Anhui Province, 350 Shushanhu Road, Hefei, Anhui 230031, People's Republic of China

<sup>‡</sup>University of Science and Technology of China, No. 96 Jinzhai Road, Hefei, Anhui 230026, People's Republic of China

<sup>§</sup>Bioenergy Forest Research Center of State Forestry Administration, 350 Shushanhu Road, Hefei, Anhui 230031, People's Republic of China

<sup>¶</sup>Institute of Microbiology, Chinese Academy of Sciences, No. 1 Beichen West Road, Beijing 100101, People's Republic of China

<sup>||</sup>M.W. and X.S. are co-first authors.

#### **Corresponding Authors**

\*Tel.: +86-551-65595143; Fax: +86-551-65591413; E-mail: dqcai@ipp.ac.cn (D.C.).

\*Tel: +86-551-65595012; Fax: +86-551-65591413; E-mail: zywu@ipp.ac.cn (Z.W.).

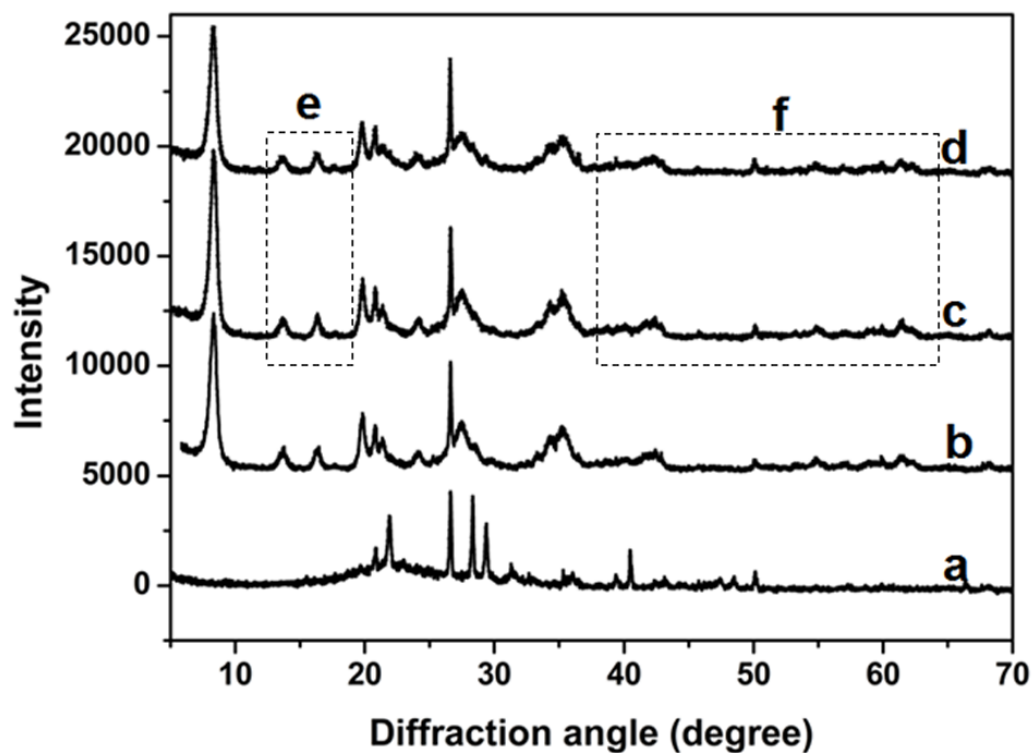

Figure S1: XRD spectra of BCS (a), ATP (b), ATP30 (c), and LCAU (d). It could be seen clearly that no obvious new peak or peak shift was found in ATP30 spectra compared with ATP, indicating that no obvious chemical or crystal structure change occurred during the irradiation process.

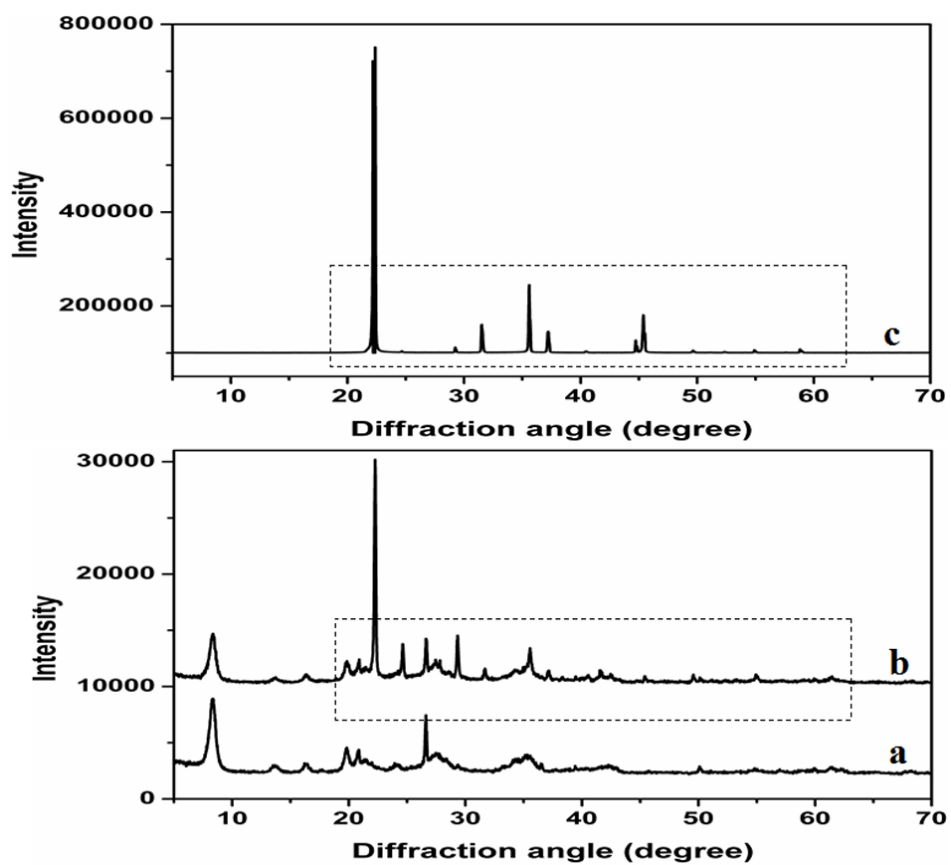

Figure S2: XRD spectra of LCAU (a), and LCFU (b), urea (c). It could be seen clearly that LCFU possessed the characteristic peaks of both urea and LCAU, presenting that urea was successfully adsorbed onto LCAU.

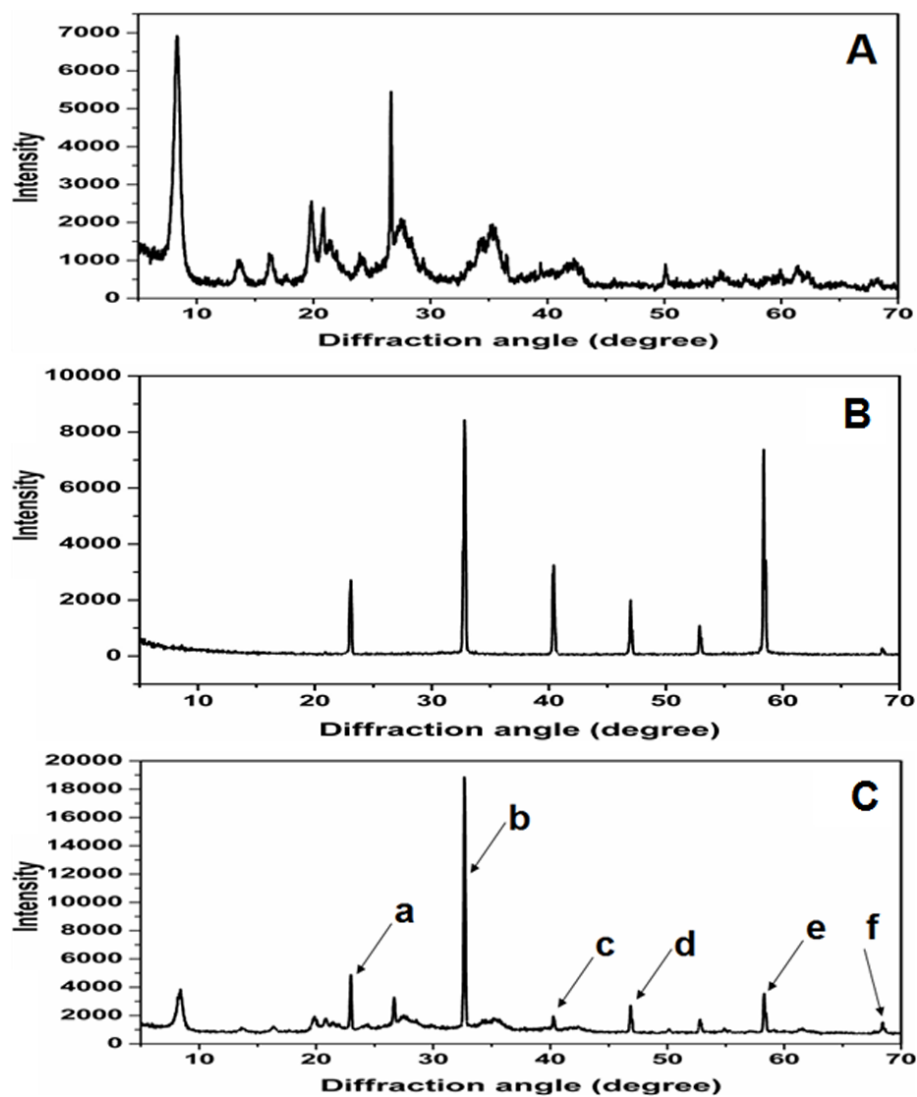

Figure S3: XRD spectra of LCFN (A), NH<sub>4</sub>Cl (B), and LCFN (C). It could be seen clearly that LCFN possessed the characteristic peaks of ATP30 and BCS, indicating that NH<sub>4</sub>Cl was successfully adsorbed into the pores of LCFN.
